# Supplementary material for: Comparative Study of Digital Squamous Cell Carcinoma in Giant, Standard, and Miniature Schnauzers
Source: MDPI journal article supplement (doi:10.3390/ani13121990), 2023-06-14
Supplement: s1 [file s1]

Table S1: Cohort 2.

| Cohort 2<br>Dog No. | breed GS=<br>giant<br>schnauzer<br>SS=standard<br>schnauzer, | coat colour | Age (years) | Sex | Number of<br>affected toes | Number of<br>affected legs |
|---------------------|--------------------------------------------------------------|-------------|-------------|-----|----------------------------|----------------------------|
| 1                   | GS                                                           | black       | 6           | fn  | 3                          | 2                          |
| 2                   | GS                                                           | black       | 10          | mn  | 1                          | 1                          |
| 3                   | GS                                                           | black       | 12          | m   | 1                          | 1                          |
| 4                   | GS                                                           | black       | 8           | fn  | 1                          | 1                          |
| 5                   | GS                                                           | black       | 8           | f   | 1                          | 1                          |
| 6                   | GS                                                           | black       | 7           | f   | 1                          | 1                          |
| 7                   | GS                                                           | black       | 7           | mn  | 1                          | 1                          |
| 8                   | GS                                                           | black       | 7           | m   | 2                          | 2                          |
| 9                   | GS                                                           | black       | 10          | m   | 1                          | 1                          |
| 10                  | GS                                                           | black       | 9           | m   | 1                          | 1                          |
| 11                  | GS                                                           | black       | 7           | f   | 2                          | 2                          |
| 12                  | GS                                                           | black       | 8           | m   | 3                          | 3                          |
| 13                  | GS                                                           | black       | 7           | m   | 1                          | 1                          |
| 14                  | GS                                                           | black       | 12          | m   | 1                          | 1                          |
| 15                  | GS                                                           | black       | 10          | f   | 1                          | 1                          |
| 16                  | GS                                                           | black       | 8           | m   | 1                          | 1                          |
| 17                  | GS                                                           | black       | 6           | m   | 1                          | 1                          |
| 18                  | GS                                                           | black       | 5           | f   | 1                          | 1                          |
| 19                  | GS                                                           | black       | 9           | m   | 1                          | 1                          |
| 20                  | GS                                                           | black       | 7           | m   | 1                          | 1                          |
| 21                  | GS                                                           | black       | 4           | m   | 1                          | 1                          |
| 22                  | GS                                                           | black       | 9           | f   | 1                          | 1                          |
| 23                  | SS                                                           | black       | 8           | m   | 1                          | 1                          |
| 24                  | SS                                                           | black       | 8           | mn  | 1                          | 1                          |
| 25                  | SS                                                           | black       | 8           | fn  | 1                          | 1                          |
| 26                  | SS                                                           | black       | 6           | mn  | 3                          | 2                          |
| 27                  | SS                                                           | black       | 10          | f   | 1                          | 1                          |
| 28                  | SS                                                           | black       | 8           | fn  | 1                          | 1                          |
| 29                  | SS                                                           | black       | 8           | m   | 1                          | 1                          |
| 30                  | SS                                                           | black       | 7           | m   | 1                          | 1                          |
| 31                  | SS                                                           | black       | 10          | f   | 1                          | 1                          |
| 32                  | SS                                                           | black       | 12          | mn  | 2                          | 2                          |
| 33                  | SS                                                           | black       | 14          | mn  | 1                          | 1                          |
| 34                  | SS                                                           | black       | 9           | m   | 1                          | 1                          |
| 35                  | SS                                                           | black       | 11          | m   | 2                          | 2                          |
| 36                  | SS                                                           | black       | 12          | f   | 1                          | 1                          |
| 37                  | SS                                                           | black       | 10          | m   | 1                          | 1                          |
| 38                  | SS                                                           | black       | 12          | m   | 2                          | 2                          |
| 39                  | SS                                                           | black       | 10          | mn  | 3                          | 2                          |

|    |    |             |    |    |   |   |
|----|----|-------------|----|----|---|---|
| 40 | SS | black       | 6  | m  | 1 | 1 |
| 41 | SS | black       | 8  | m  | 2 | 2 |
| 42 | SS | black       | 7  | f  | 2 | 2 |
| 43 | SS | black       | 10 | m  | 1 | 1 |
| 44 | SS | black       | 7  | m  | 6 | 3 |
| 45 | SS | black       | 7  | f  | 3 | 3 |
| 46 | SS | black       | 10 | fn | 2 | 1 |
| 47 | SS | black       | 13 | mn | 1 | 1 |
| 48 | SS | black       | 10 | m  | 3 | 3 |
| 49 | SS | pepper-salt | 10 | fn | 1 | 1 |
| 50 | SS | pepper-salt | 9  | f  | 1 | 1 |
| 51 | SS | pepper-salt | 12 | m  | 1 | 1 |
| 52 | SS | pepper-salt | 13 | m  | 1 | 1 |
| 53 | SS | pepper-salt | 11 | m  | 1 | 1 |
| 54 | SS | black       | 9  | f  | 1 | 1 |
| 55 | SS | black       | 11 | mn | 2 | 2 |
| 56 | SS | black       | 11 | f  | 2 | 2 |
| 57 | SS | black       | 11 | m  | 1 | 1 |
| 58 | SS | black       | 11 | f  | 1 | 1 |
| 59 | SS | black       | 14 | m  | 1 | 1 |
| 60 | SS | black       | 10 | fn | 1 | 1 |
| 61 | SS | black       | 9  | m  | 4 | 2 |
